# Supplementary material for: Clinical frailty assessment might be associated with mortality in incident dialysis patients
Source: PubMed Central journal article supplement (PMC9587224; doi:10.1038/s41598-022-22483-8), 2022-10-21
Supplement: 41598_2022_22483_MOESM1_ESM.pdf [file 41598_2022_22483_MOESM1_ESM.pdf]

Supplementary materials

Supplementary Table 1. Results of univariate cox proportional hazards model analysis for 2-year mortality

| <b>Variables</b>                                                         | <b>HR (95% CI)</b> | <b><i>p</i></b> |
|--------------------------------------------------------------------------|--------------------|-----------------|
| Age                                                                      | 1.03 (1.00–1.07)   | .03             |
| Male                                                                     | 2.41 (0.83–6.96)   | .07             |
| diabetic kidney disease<br>as primary kidney disease                     | 0.60 (0.26–1.38)   | .22             |
| planned initiation of dialysis<br>hemodialysis (vs. peritoneal dialysis) | 0.36 (0.16–0.78)   | < .01           |
| 3.84 (0.52–28.3)                                                         | .19                |                 |
| hospitalization period                                                   | 1.01 (0.99–1.02)   | .06             |
| history of CVD                                                           | 1.37 (0.64–2.91)   | .42             |
| systolic blood pressure                                                  | 0.97 (0.96–0.99)   | < .01           |
| diastolic blood pressure                                                 | 0.99 (0.96–1.01)   | .31             |
| body mass index                                                          | 0.95 (0.87–1.02)   | .18             |
| mean CFS score                                                           | 1.99 (1.53–2.58)   | < .01           |
| Hb                                                                       | 0.78 (0.62–0.99)   | .04             |
| Cr                                                                       | 0.69 (0.56–0.83)   | < .01           |
| BUN                                                                      | 1.01 (0.99–1.02)   | .40             |
| eGFR                                                                     | 1.29 (1.12–1.44)   | < .01           |
| corrected Ca                                                             | 1.09 (0.65–1.82)   | .74             |
| IP                                                                       | 0.94 (0.71–1.20)   | .65             |
| TP                                                                       | 0.97 (0.55–1.76)   | .93             |
| Alb                                                                      | 0.37 (0.19–0.73)   | < .01           |
| CRP                                                                      | 1.15 (1.07–1.22)   | < .01           |
| T.chol                                                                   | 0.98 (0.97–0.99)   | < .01           |
| TG                                                                       | 0.997 (0.99–1.00)  | .33             |
| UA                                                                       | 1.16 (0.96–1.40)   | .11             |
| HbA1C                                                                    | 0.998 (0.60–1.54)  | .99             |
| BNP                                                                      | 1.00 (1.00–1.0004) | < .01           |

Supplementary Table 2. Results from multivariate cox proportional hazards model for 2-year mortality

| Variables                      | Model 1          |          | Model 2          |          | Model 3           |          |
|--------------------------------|------------------|----------|------------------|----------|-------------------|----------|
|                                | OR (95% CI)      | <i>p</i> | OR (95% CI)      | <i>p</i> | OR (95% CI)       | <i>p</i> |
| Age                            | 1.02 (0.99–1.05) | .11      | 1.02 (0.99–1.05) | .09      | 1.03 (0.99–1.06)  | .11      |
| mean CFS score                 | 1.94 (1.40–2.66) | <.01     | 1.81 (1.38–2.39) | <.01     | 1.73 (1.28–2.31)  | <.01     |
| planned initiation of dialysis | 0.92 (0.36–2.33) | .86      |                  |          |                   |          |
| systolic blood pressure        |                  |          | 0.99 (0.97–1.01) | .09      |                   |          |
| T chol                         |                  |          |                  |          | 0.99 (0.98–0.998) | .03      |
| BNP                            |                  |          |                  |          |                   |          |
| Cr                             |                  |          |                  |          |                   |          |
| Alb                            |                  |          |                  |          |                   |          |
| CRP                            |                  |          |                  |          |                   |          |
| Variables                      | Model 4          |          | Model 5          |          | Model 6           |          |
|                                | OR (95% CI)      | <i>p</i> | OR (95% CI)      | <i>p</i> | OR (95% CI)       | <i>p</i> |
| Age                            | 1.02 (0.99–1.05) | .20      | 1.01 (0.97–1.04) | .76      | 1.03 (0.99–1.06)  | .06      |
| mean CFS score                 | 1.85 (1.37–2.48) | <.01     | 1.73 (1.29–2.31) | <.01     | 1.70 (1.26–2.30)  | <.01     |
| planned initiation of dialysis |                  |          |                  |          |                   |          |
| systolic blood pressure        |                  |          |                  |          |                   |          |
| T chol                         |                  |          |                  |          |                   |          |
| BNP                            | 1.00 (0.99–1.00) | .22      |                  |          |                   |          |
| Cr                             |                  |          | 0.78 (0.63–0.93) | <.01     |                   |          |
| Alb                            |                  |          | 0.72 (0.35–1.48) | .37      |                   |          |
| CRP                            |                  |          |                  |          | 1.10 (0.997–1.18) | .057     |
