# Supplementary material for: Clinical frailty assessment might be associated with mortality in incident dialysis patients
Source: PubMed Central journal article supplement (PMC9587224; doi:10.1038/s41598-022-22483-8), 2022-10-21
Supplement: 41598_2022_22483_MOESM2_ESM.pdf [file 41598_2022_22483_MOESM2_ESM.pdf]

(A)

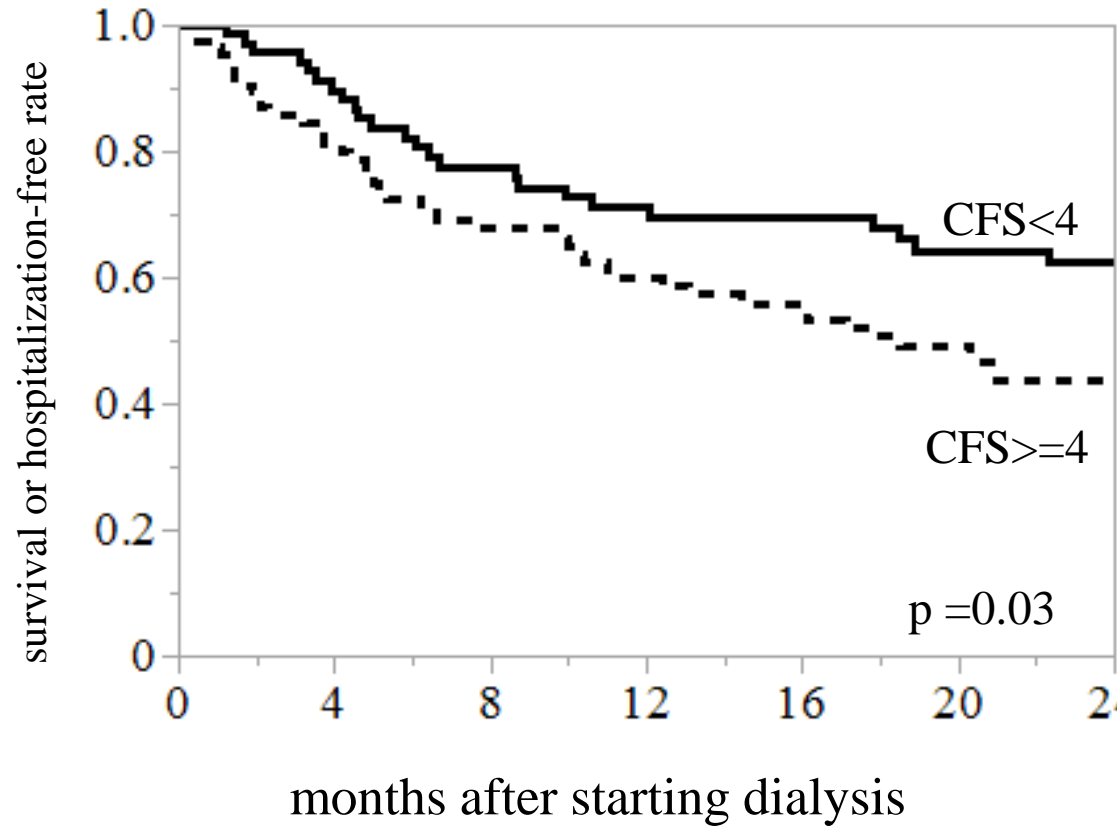

(B)

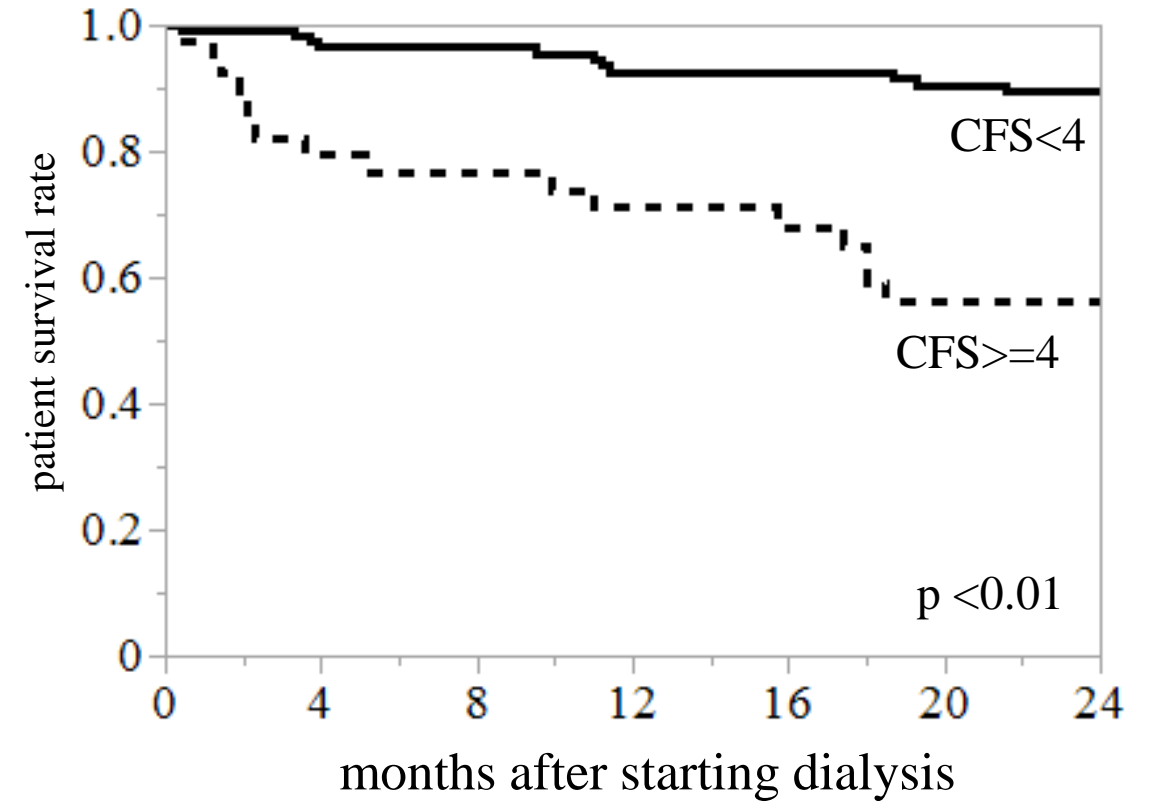

Supplementally Figure 1. Kaplan-Meier analysis for composite outcome (survival or hospitalization-free rate) (A) and survival rate (B) within 24 months after initiating dialysis.

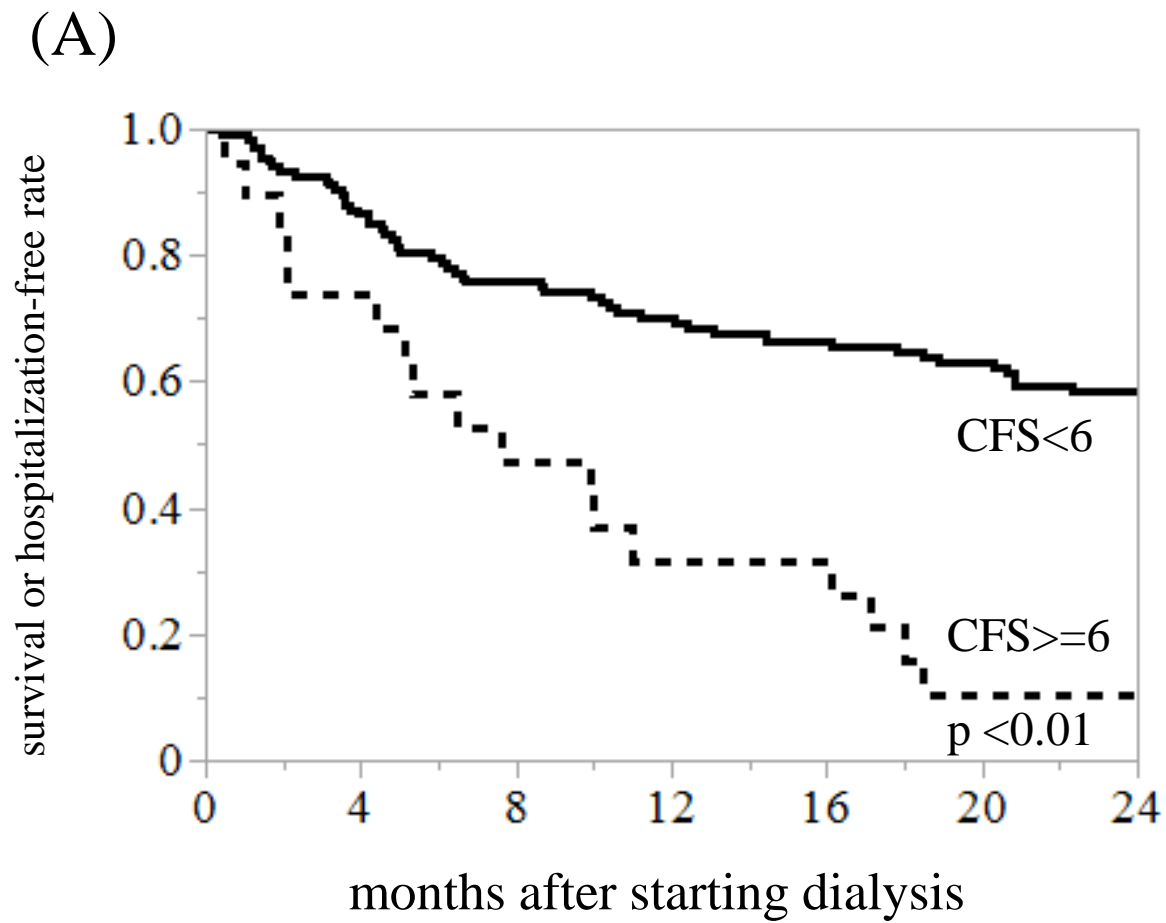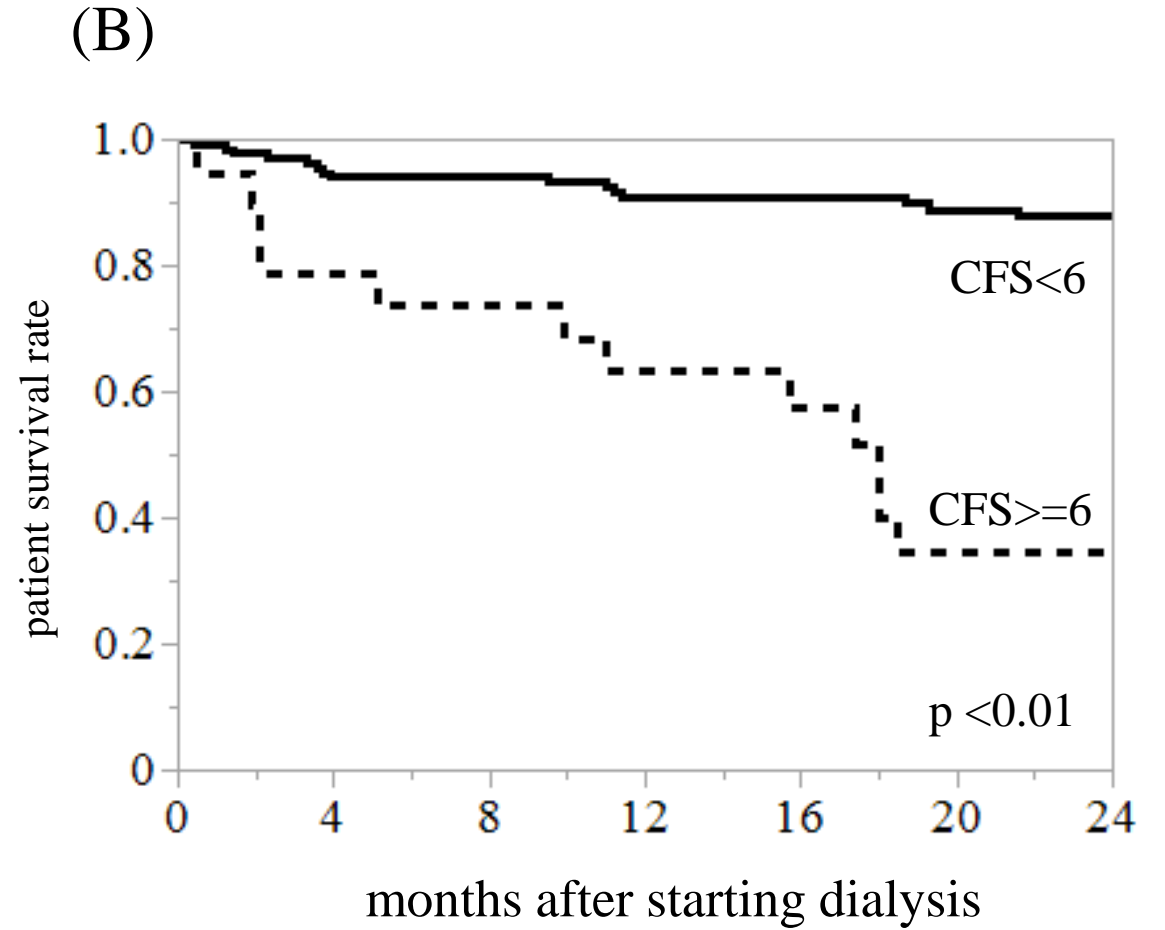

Supplementally Figure 2. Kaplan-Meier analysis for composite outcome (survival or hospitalization-free rate) (A) and survival rate (B) within 24 months after initiating dialysis.
